# Supplementary material for: Assessing SNP-markers to study population mixing and ecological adaptation in Baltic cod
Source: PLoS One. 2019 Jun 20;14(6):e0218127. doi: 10.1371/journal.pone.0218127 (PMC6586271; doi:10.1371/journal.pone.0218127)
Supplement: S4 Table — (XLSX) [file pone.0218127.s005.xlsx]

## Sheet: Table S4
S4 Table
Pairwise FST estimates (Weir & Cockerham, 1984) (below diagonal) and p- values
between cod samples from Arkona Basin (ARK), Bornholm (BOR), Kiel Bight (KBI), Öresund (ORE) and North Sea (NOR) based on 68.8K.
Bold numbers indicate significant FST values (p < 0.05), that remained significant following correction for multiple testing.
	NOR	ORE	KBI	ARK	BOR
NOR		<0.001	<0.001	<0.001	<0.001
ORE	0.008		0.998	<0.001	<0.001
KBI	0.007	-0.004		<0.001	<0.001
ARK	0.057	0.041	0.035		0.609
BOR	0.065	0.043	0.04	-0.005
